# Supplementary figures and images for: On the Tensile Strength of Spark Plasma Sintered AlMgB14 Ceramics
Source: MDPI journal article supplement (doi:10.3390/nano12213805), 2022-10-28

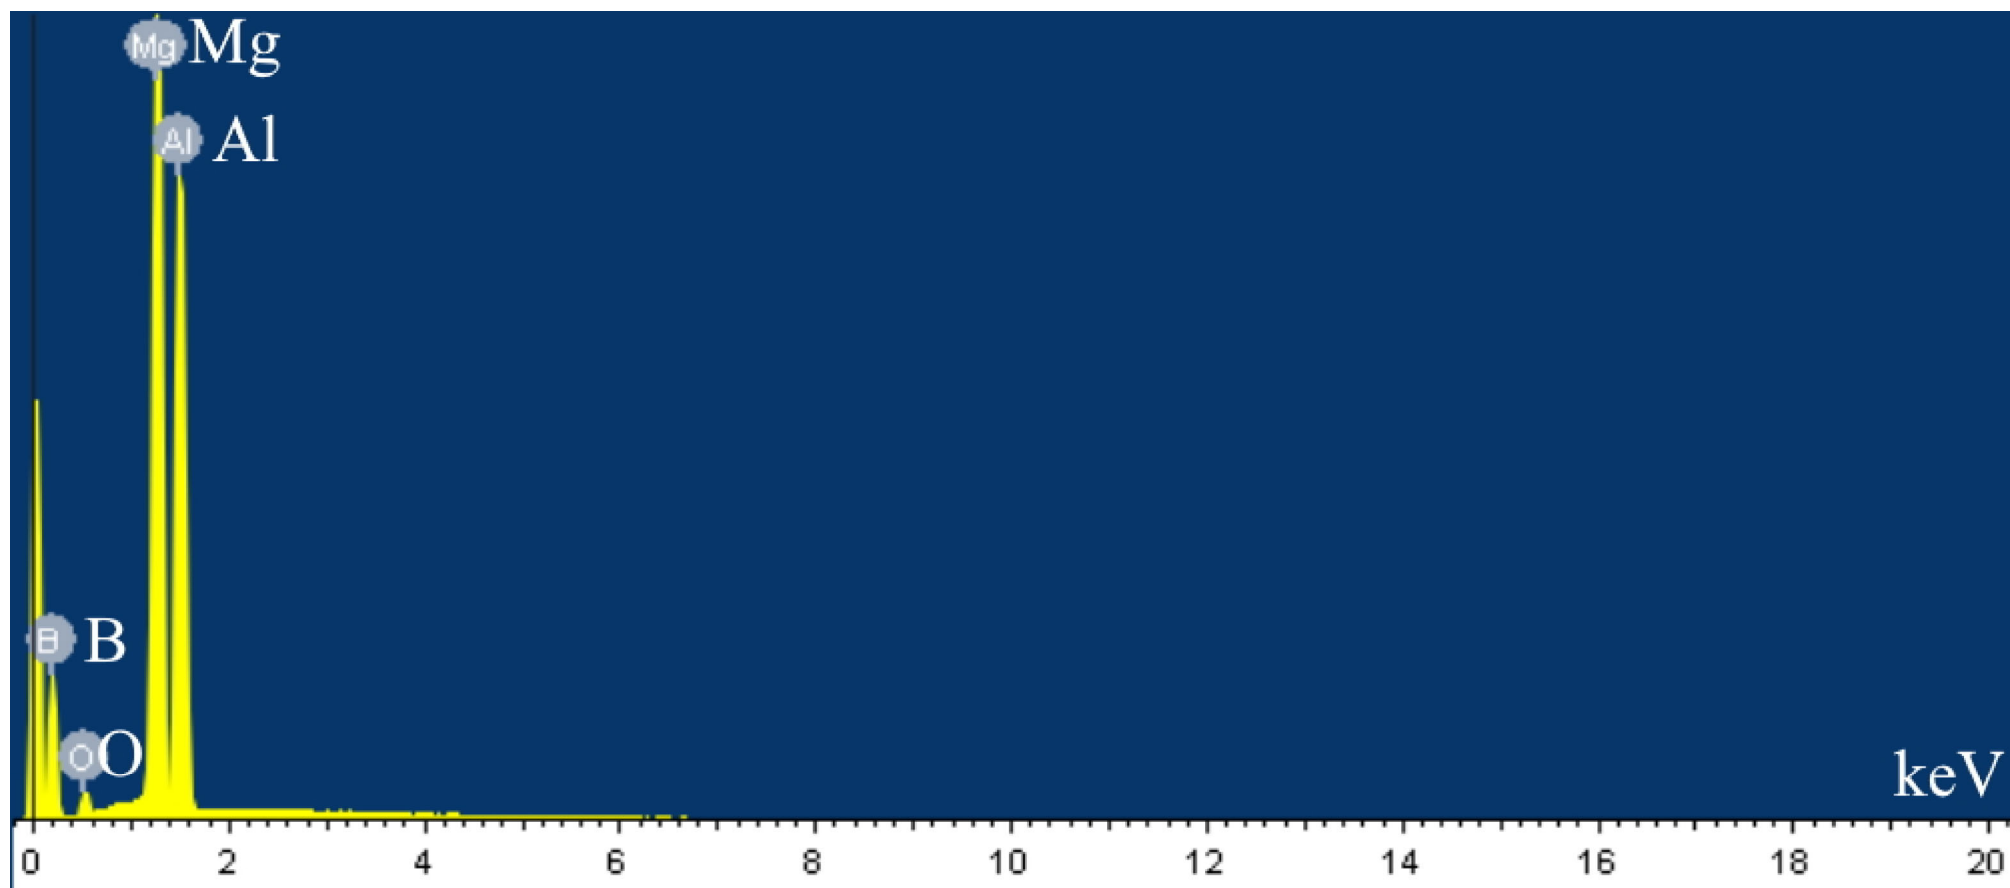

Supplement: s1 [file nanomaterials-1987718-supplementary.pdf › nanomaterials-1987718-supplementary.pdf]
